# Supplementary material for: Cross-cutting research and future directions under the GAPS networks
Source: Royal Society of Chemistry journal article supplement (doi:10.1039/d4va00034j), 2024-01-01
Supplement: d4va00034j1.pdf [file d4va00034j1.pdf]

## Supplementary Information

### Cross-cutting Research and Future Directions under the GAPS Networks

Tom Harner<sup>1\*</sup>, Amandeep Saini<sup>1</sup>, Pourya Shahpoury<sup>2</sup>, Anita Eng<sup>1</sup>, Jasmin Schuster<sup>1</sup>, Egide Kalisa<sup>3</sup>, Jacob Mastin<sup>1</sup>

<sup>1</sup>*Air Quality Processes Research Section, Environment and Climate Change Canada*

<sup>2</sup>*Trent University [Pourya – please provide your affiliation info]*

<sup>3</sup>*Western University [Egide to provide info.]*

\*Corresponding author, [Tom.Harner@ec.gc.ca](mailto:Tom.Harner@ec.gc.ca)

#### Text S1 – Additional PUF/SIP disk Operation Information

There is some degree of site-to-site variability in sampling rates, with positive deviations associated with sustained high winds at the sampling site (Tuduri et al., 2007; Herkert et al., 2018). Sampling rates for the linear uptake region do not vary substantially across the range of semi-volatile target analytes (log K<sub>oa</sub> values higher than about 5). Linear sampling rates will begin to decline for chemicals having low octanol-air partition coefficients (K<sub>oa</sub> values) as they approach equilibrium partitioning between PUF and air. For low volatility chemicals (log K<sub>oa</sub> greater than 10) and for particles, sampling will remain in the linear uptake phase for several months and even years. SIP disks have a higher sorptive capacity compared to PUF disks and are preferable for use for chemicals having log K<sub>oa</sub> values less than about 7, which can equilibrate in a PUF disk exposed to air within a few weeks or even less. The use of SIP disk for these chemicals ensures linear-phase sampling during typical deployment periods lasting 2-3 months.

**Table S1.** Current GAPS network site details.

| Site ID                                                     | Location                 | Country        | Site Classification |
|-------------------------------------------------------------|--------------------------|----------------|---------------------|
| <b>Africa</b>                                               |                          |                |                     |
| AF04                                                        | De Aar                   | South Africa   | Background          |
| AF06                                                        | Bukasa Island            | Uganda         | Background          |
| AF07                                                        | Mount Kenya              | Kenya          | Background          |
| AF10                                                        | Yaba, Lagos              | Nigeria        | Urban               |
| AF11                                                        | Cape Verde Observatory   | Cape Verde     | Background          |
| AF12                                                        | Cape Point               | South Africa   | Background          |
| <b>Asia</b>                                                 |                          |                |                     |
| AS11                                                        | Manila                   | Philippines    | Urban               |
| AS12                                                        | Danam Valley             | Malaysia       | Background          |
| AS13                                                        | Bukit Kotobang           | Indonesia      | Background          |
| AS19                                                        | Jeju Island              | South Korea    | Background          |
| AS21                                                        | Abdali                   | Kuwait         | Background          |
| AS27                                                        | Hanthana                 | Sri Lanka      | Rural               |
| AS28                                                        | Hanimaadhoo              | Maldives       | Background          |
| <b>GRULAC</b><br>(Group of Latin America and the Caribbean) |                          |                |                     |
| GR03                                                        | Tapanti National Park    | Costa Rica     | Background          |
| GR04                                                        | Arauca                   | Colombia       | Rural               |
| GR12                                                        | Ragged Point             | Barbados       | Background          |
| GR13                                                        | Santa Cruz Island        | Ecuador        | Background          |
| GR16                                                        | Sonora                   | Mexico         | Agricultural        |
| GR17                                                        | Yucatan                  | Mexico         | Background          |
| GR19                                                        | Quito                    | Ecuador        | Urban               |
| GR20                                                        | Pierre Auger Observatory | Argentina      | Background          |
| GR21                                                        | Mendoza Province         | Argentina      | Rural               |
| GR22                                                        | Manizales                | Colombia       | Background          |
| GR23                                                        | São Luís do Maranhã      | Brazil         | Urban               |
| GR24                                                        | São José                 | Brazil         | Background          |
| GR26                                                        | Salta                    | Argentina      | Background          |
| GR27                                                        | Rio Gallegos             | Argentina      | Rural               |
| GR28                                                        | Concepción               | Chile          | Urban               |
| GR29                                                        | Chacaltaya               | Bolivia        | Background          |
| <b>Central and Eastern Europe</b>                           |                          |                |                     |
| EE03                                                        | Košetice                 | Czech Republic | Background          |
| <b>WEOG</b><br>(Western European and Others Group)          |                          |                |                     |
| WE01                                                        | Alert                    | Canada         | Polar               |
| WE02                                                        | Utqiagvik                | USA            | Polar               |
| WE05                                                        | Bratt's Lake             | Canada         | Agricultural        |
| WE06                                                        | Whistler                 | Canada         | Background          |
| WE09                                                        | Downsview                | Canada         | Urban               |
| WE12                                                        | Tudor Hill               | Bermuda        | Background          |

|      |                       |                |            |
|------|-----------------------|----------------|------------|
| WE13 | Ny-Ålesund            | Norway         | Polar      |
| WE14 | Stórhöfði             | Iceland        | Background |
| WE16 | Malin Head            | Ireland        | Background |
| WE17 | Paris                 | France         | Urban      |
| WE22 | Darwin                | Australia      | Rural      |
| WE23 | Cape Grim             | Australia      | Background |
| WE25 | Little Fox Lake       | Canada         | Background |
| WE26 | Dyea                  | USA            | Background |
| WE30 | Pallas                | Finland        | Background |
| WE32 | Fraserdale            | Canada         | Background |
| WE33 | Ucleuelet             | Canada         | Background |
| WE34 | Sable Island          | Canada         | Background |
| WE35 | Point Reyes           | USA            | Background |
| WE37 | Mauna Loa Observatory | USA            | Background |
| WE38 | Tula                  | American Samoa | Background |
| WE39 | Temple Basin          | New Zealand    | Background |
| WE40 | Groton                | USA            | Background |
| WE41 | Doñana National Park  | Spain          | Background |
| WE43 | Mount Revelstoke      | Canada         | Background |
| WE44 | Izana                 | Spain          | Background |
| WE45 | Longwoods             | Canada         | Rural      |
| WE46 | Warsaw Caves          | Canada         | Rural      |
| WE47 | Egbert                | Canada         | Rural      |

**Table S2.** Current GAPS Megacity (MC) network site details.

| Site ID                                                     | Location      | Country        |
|-------------------------------------------------------------|---------------|----------------|
| <b>Africa</b>                                               |               |                |
| MC-AF01                                                     | Lagos         | Nigeria        |
| MC-AF02                                                     | Cairo         | Egypt          |
| MC-AF03                                                     | Nairobi       | Kenya          |
| MC-AF04                                                     | Johannesburg  | South Africa   |
| <b>Asia</b>                                                 |               |                |
| MC-AS01                                                     | Kolkata       | India          |
| MC-AS02                                                     | Beijing       | China          |
| MC-AS03                                                     | Bangkok       | Thailand       |
| MC-AS04                                                     | Tokyo         | Japan          |
| MC-AS05                                                     | New Delhi     | India          |
| MC-AS06                                                     | Seoul         | South Korea    |
| MC-AS07                                                     | Riyadh        | Saudi Arabia   |
| <b>Central and Eastern Europe</b>                           |               |                |
| MC-CEE01                                                    | Warsaw        | Poland         |
| <b>GRULAC</b><br>(Group of Latin America and the Caribbean) |               |                |
| MC-GR01                                                     | São Paulo     | Brazil         |
| MC-GR02                                                     | Bogotá        | Colombia       |
| MC-GR03                                                     | Mexico City   | Mexico         |
| MC-GR04                                                     | Santiago      | Chile          |
| MC-GR05                                                     | Buenos Aires  | Argentina      |
| <b>WEOG</b><br>(Western European and Others Group)          |               |                |
| MC-WE01                                                     | Toronto       | Canada         |
| MC-WE02                                                     | New York City | USA            |
| MC-WE03                                                     | Sydney        | Australia      |
| MC-WE04                                                     | Istanbul      | Turkey         |
| MC-WE05                                                     | London        | United Kingdom |
| MC-WE06                                                     | Madrid        | Spain          |

## References

Herkert, Nicholas J, Scott N Spak, Austen Smith, Jasmin K Schuster, Tom Harner, Andres Martinez, and Keri C Hornbuckle. 2018. 'Calibration and evaluation of PUF-PAS sampling rates across the Global Atmospheric Passive Sampling (GAPS) network', Environmental Science: Processes & Impacts.

Tuduri, Ludovic, Harner, Tom. 2006. 'Polyurethane foam (PUF) disks passive air samplers: wind effect on sampling rate', Environmental Pollution.
